# Supplementary material for: Nivolumab induced encephalopathy in a man with metastatic renal cell cancer: a case report
Source: PubMed Central journal article supplement (PMC6138913; doi:10.1186/s13256-018-1786-9), 2018-09-15
Supplement: 13256_2018_1786_MOESM1_ESM.pdf [file 13256_2018_1786_MOESM1_ESM.pdf]

Cytoreductive nephrectomy right

Denosumab

Sunitinib

Radiotherapy  
of Th11

Nivolumab

Corticoid  
therapy  
i.v.

Infliximab

Death

2016

2/2016

4/2016

5/2016

8/2016

Chorea like symptoms

CT (Fig. 1 and 2)

MRI (Fig.3)

CSF (Fig. 4)

9/2016
